# Hypertensive disorders of pregnancy and risk of cardiovascular disease: A Mendelian Randomisation study in the UK Biobank

Lena Tschiderer, PhD,<sup>1,2</sup> Yvonne T van der Schouw, PhD,<sup>2</sup> Stephen Burgess, PhD,<sup>3,4,5</sup> Kitty WM Bloemenkamp, PhD,<sup>6</sup> Lisa Seekircher, PhD,<sup>1</sup> Peter Willeit, PhD,<sup>1,3</sup> N Charlotte Onland-Moret, PhD,<sup>2</sup> Sanne AE Peters, PhD<sup>2,7,8</sup>

<sup>1</sup>Institute of Health Economics, Medical University of Innsbruck, Innsbruck, Austria;

<sup>2</sup>Julius Centre for Health Sciences and Primary Care, University Medical Centre Utrecht, Utrecht, the Netherlands;

<sup>3</sup>Department of Public Health and Primary Care, University of Cambridge, Cambridge, United Kingdom;

<sup>4</sup>Heart and Lung Research Institute, University of Cambridge, Cambridge, United Kingdom;

<sup>5</sup>MRC Biostatistics Unit, School of Clinical Medicine, University of Cambridge, Cambridge, United Kingdom;

<sup>6</sup>Department of Obstetrics, Division Women and Baby, Birth Centre Wilhelmina Children Hospital, University Medical Centre Utrecht, Utrecht, the Netherlands;

<sup>7</sup>The George Institute for Global Health, School of Public Health, Imperial College London, London, United Kingdom;

<sup>8</sup>The George Institute for Global Health, University of New South Wales, Sydney, New South Wales, Australia.

**Short title:** Hypertensive disorders of pregnancy & CVD risk

**Correspondence to:**

Sanne AE Peters

Julius Centre for Health Sciences and Primary Care, University Medical Centre Utrecht, Utrecht, the Netherlands

Utrecht, Utrecht, the Netherlands

Phone: +31887568181

E-mail: [S.A.E.Peters@umcutrecht.nl](mailto:S.A.E.Peters@umcutrecht.nl)

**Word count:** 5,992; 1 Table; 4 Figures

## 1 **Abstract**

2 **Background:** Observational studies show that hypertensive disorders of pregnancy  
3 (HDPs) are related to unfavourable maternal cardiovascular disease (CVD) risk  
4 profiles later in life. We investigated whether genetic liability to pre-  
5 eclampsia/eclampsia and gestational hypertension is associated with CVD risk  
6 factors and occurrence of CVD events.

7 **Methods:** We obtained genetic associations with HDPs from a genome-wide  
8 association study and used individual-participant-data of women and men from the  
9 UK Biobank to obtain genetic associations with CVD risk factors and CVD events  
10 (defined as myocardial infarction or stroke). The rationale for including men and  
11 nulligravidae was to study genetic liability to HDPs and CVD risk without  
12 experiencing the underlying phenotype. We applied Mendelian Randomisation  
13 analysis using inverse variance weighted regression in our primary analysis.

14 **Results:** We included 264,160 women (mean age 56.4 [SD 8.0]) and 223,043 men  
15 (mean age 56.7 [8.2]) with available genetic data. Genetically proxied pre-  
16 eclampsia/eclampsia was related to higher risk of CVD with odds ratios of 1.20 (1.01,  
17 1.43) and 1.29 (1.08, 1.53) in women and men, respectively. For genetically proxied  
18 gestational hypertension, odds ratios for CVD were 1.22 (1.10, 1.36) and 1.28 (1.16,  
19 1.42) in women and men, respectively. Furthermore, genetically proxied HDPs were  
20 associated with higher levels of systolic and diastolic blood pressure and younger  
21 age at hypertension diagnosis in both women and men.

22 **Conclusions:** Genetic liability to HDPs including pre-eclampsia/eclampsia and  
23 gestational hypertension is associated with higher CVD risk, implying biological  
24 mechanisms relating to these disorders are causally related to CVD risk in both  
25 women and men.

## 26 Introduction

27 Hypertensive disorders of pregnancy (HDPs) affected one in eight hospital deliveries  
28 in 2019 and came along with one in four maternal deaths between 2017 and 2019 in  
29 the US.<sup>1</sup> Globally, there were 18.1 million incident cases of hypertensive pregnancy  
30 disorders in 2019.<sup>2</sup> They can express as different phenotypes including gestational  
31 hypertension, pre-eclampsia/eclampsia, and HELLP syndrome. Pre-eclampsia is a  
32 multi-organ disease originating from a dysfunction of the placenta and affects  
33 approximately one in twenty deliveries.<sup>3,4</sup> The International Society for the Study of  
34 Hypertension in Pregnancy defines pre-eclampsia as gestational hypertension with  
35 one or more of the following concomitants: (1) proteinuria, (2) other maternal organ  
36 dysfunction (acute kidney injury, liver involvement, neurological or haematological  
37 complications), or (3) uteroplacental dysfunction.<sup>5</sup> Eclampsia is a progression of pre-  
38 eclampsia, in which women additionally experience seizures.<sup>6</sup> Gestational  
39 hypertension is defined as *de novo* hypertension at  $\geq 20$  weeks of gestation without  
40 the additional signs of pre-eclampsia.<sup>5</sup>

41 A range of risk factors for HDPs have been proposed including higher pre-pregnancy  
42 body mass index (BMI), pre-pregnancy diabetes mellitus, chronic hypertension,  
43 chronic autoimmune disease, and maternal age.<sup>7,8</sup> Furthermore, HDPs are related to  
44 multiple immediate, short-term, and long-term health concerns, which can affect the  
45 mother and the foetus and neonate.<sup>9</sup> Short-term outcomes are, for instance, stillbirth  
46 and preterm delivery,<sup>9</sup> whereas on the long term HDPs are associated with maternal  
47 cardiovascular risk factors after pregnancy including diabetes mellitus,  
48 hyperlipidaemia, and hypertension.<sup>9</sup> Observational studies have also reported a  
49 relation between HDPs and higher risk of maternal cardiovascular disease (CVD)  
50 events later in life,<sup>9</sup> which has been confirmed in co-sibling analyses<sup>10</sup> and by a  
51 previous Mendelian Randomisation (MR) study that was restricted to sex-combined  
52 genetic associations with CVD events.<sup>11</sup>

53 However, the specific biological mechanisms behind HDPs and CVD risk are not  
54 entirely clear. As HDPs and CVD share a considerable amount of risk factors, the  
55 theory emerged that both phenotypes are expressions of the same disease pathway  
56 at different stages in life,<sup>12</sup> and that pregnancy enables earlier identification of

57 women at higher CVD risk.<sup>13</sup> Apart from that, HDPs could also cause long-term  
58 vascular damage leading to a higher CVD risk later in life.<sup>13</sup>

59 To better understand the role of HDPs in the development of CVD, we conducted a  
60 MR analysis of 487,203 women and men from the UK Biobank with the aim to  
61 estimate the sex-specific relation of genetic liability to pre-eclampsia/eclampsia and  
62 gestational hypertension with CVD events, blood pressure-traits, and lipid-, liver-,  
63 and kidney-related cardiovascular risk factors. The rationale for also analysing men  
64 and nulligravidae was to study the role of genetic liability to HDPs in cardiovascular  
65 risk without experiencing the underlying phenotype, which could help understand  
66 whether biological mechanisms related to HDPs or the diseases themselves are  
67 responsible for higher CVD risk.

## 68 **Methods**

69 This analysis adheres to the STROBE-MR statement (**Table S1**).<sup>14</sup> Please see the  
70 Major Resources Table in the Supplemental Materials.

### 71 **Study design and data sources**

72 The present study included data from the UK Biobank, of which details have been  
73 described previously.<sup>15</sup> Briefly, the UK Biobank is a large-scale prospective study in  
74 the general population of the UK, in which over 500,000 individuals aged 40 to 69  
75 years were recruited between 2006 and 2010.<sup>15</sup> The UK Biobank was approved by  
76 the North-West Multi-Centre Research Ethics Committee and all participants  
77 provided written informed consent.

78 For the MR analysis, we used individual-level imputed data on genetic variants.  
79 Genotyping was performed using the Affymetrix UK BiLEVE Axiom array and the  
80 Affymetrix UK Biobank Axiom Array.<sup>16,17</sup> Genotype imputation was based on the  
81 Haplotype Reference Consortium and the UK10K haplotype reference panel.<sup>18</sup>

82 Of the 502,412 UK Biobank participants, we excluded 15,209 individuals because  
83 they had missing values on the genetic variants included in our analysis. The  
84 remaining 487,203 individuals contributed to the present analysis.

85 Specific definitions of pre-eclampsia/eclampsia, gestational hypertension, CVD  
86 events, and additional variables are outlined in **Supplementary Methods**.

## 87 **Statistical analysis**

88 We summarised continuous variables with mean and standard deviation (SD), if  
89 normally distributed, and with median and interquartile range, otherwise. Categorical  
90 variables were summarised with number and percentage. For all analyses, we used  
91 two-sided statistical tests and deemed P-values $\leq$ 0.05 as statistically significant.  
92 Analyses were carried out using R 4.0.5 (The R Foundation, Vienna, Austria).

## 93 **Instrumental variable**

94 For our instrumental variables, we used SNPs for pre-eclampsia/eclampsia and  
95 gestational hypertension identified by a recent genome-wide association study  
96 (GWAS) by Honigberg et al.<sup>19</sup> We used effect sizes and standard errors from the  
97 discovery analysis, which excluded data from the UK Biobank, allowing two-sample  
98 MR.<sup>19</sup>

99 As illustrated in **Figure S1**, twelve SNPs for pre-eclampsia/eclampsia and seven  
100 SNPs for gestational hypertension were identified by the GWAS.<sup>19</sup> We harmonised  
101 the summary-level data to be represented on the same strand. Furthermore, we  
102 excluded palindromic SNPs with allele frequencies between 0.45 and 0.55. For both  
103 exposures, we excluded one palindromic SNP (rs9855086). To identify related traits,  
104 we scanned Phenoscanner<sup>20</sup> (on February 14<sup>th</sup> 2023) and extracted all traits  
105 associated with the SNPs or any proxies in high linkage disequilibrium ( $R^2\geq$ 0.8) with  
106 P-values $\leq$ 5 $\times$ 10<sup>-8</sup> omitting traits identified from the UK Biobank by Neale et al.  
107 (<http://www.nealelab.is/uk-biobank/>). Details on the SNPs included in the present  
108 analysis and related traits are provided in **Table S2**.

109 We measured the strength of our instrumental variable based on the F-statistics of  
110 each SNP individually, which ranged from 30 to 58.

## 111 **Primary analysis**

112 We conducted all analyses sex-specific and for women and men combined. For the  
113 association between the genetic variants and CVD events, we implemented logistic  
114 regression adjusting for age at baseline, sex, if appropriate, and the first 16 genetic  
115 principal components, as suggested previously.<sup>21</sup> We conducted the MR analysis

116 using the R-package *MendelianRandomization*.<sup>22</sup> In the primary analysis, we applied  
117 inverse variance weighted (IVW) regression. We obtained women-to-men ratios of  
118 odds ratios (ORs) and 95% confidence intervals (CIs) by subtracting logORs for men  
119 from logORs for women and adding sex-specific variances. All ORs in MR analyses  
120 are reported per unit increase in the log odds of genetically proxied pre-  
121 eclampsia/eclampsia and gestational hypertension.

## 122 **Sensitivity analyses**

123 Sensitivity analyses were conducted similarly to the primary analysis but by applying  
124 simple and weighted median regression, MR-Egger, and MR-PRESSO.<sup>23</sup>

125 Furthermore, we studied associations between genetic variants and CVD events  
126 using a Cox proportional hazards model. We used age as underlying timescale and  
127 adjusted for sex, if appropriate, and the first 16 genetic principal components. For  
128 this sensitivity analysis we excluded all individuals with history of CVD (defined as  
129 myocardial infarction or stroke) at baseline. Time-to-event was defined as time to the  
130 first CVD event, death, or end of follow-up, whichever occurred first.

131 Moreover, we conducted a sensitivity analysis, classifying women into ever and  
132 never pregnant. We obtained ever-to-never-pregnant ratios of ORs and 95% CIs by  
133 subtracting logORs for never pregnant from logORs for ever pregnant women and  
134 adding corresponding variances.

## 135 **Secondary analyses**

136 In addition, we conducted a MR analysis using a set of cardiovascular risk factors as  
137 outcome variables. We analysed blood pressure-related traits including systolic  
138 blood pressure (SBP), diastolic blood pressure (DBP), and age at hypertension  
139 diagnosis. Furthermore, we analysed additional CVD risk factors including BMI, total  
140 cholesterol, high-density lipoprotein cholesterol, triglycerides, low-density lipoprotein  
141 cholesterol, lipoprotein(a), apolipoprotein A1, apolipoprotein B, HbA1c, creatinine,  
142 albumin, ALAT, ASAT, GGT, and C-reactive protein. For obtaining genetic  
143 associations with risk factors, we used linear regression analysis adjusting for age,  
144 sex, if appropriate, and the first 16 genetic principal components,<sup>21</sup> and divided all  
145 cardiovascular risk factors by their SD to enhance the comparison between the  
146 individual risk factors. The MR analysis was based on IVW regression.

## 147 **Results**

### 148 **Characteristics of the study population**

149 Baseline characteristics of the included participants are outlined in **Table 1**. The  
150 present analysis included 264,160 (54%) women and 223,043 (46%) men. Mean age  
151 at baseline was 56.5 (SD 8.1) years. CVD was reported in 13,861 women (7,232  
152 myocardial infarctions; 7,436 strokes) and 27,682 men (19,746 myocardial  
153 infarctions; 10,104 strokes).

### 154 **MR analysis of genetically proxied HDPs and risk of CVD**

#### 155 **Primary analysis**

156 As depicted in **Figure 1**, in women and men, respectively, genetically proxied pre-  
157 eclampsia/eclampsia was related to a higher risk of CVD with ORs of 1.20 (95% CI  
158 1.01, 1.43) and 1.29 (1.08, 1.53) and to a higher risk of ischaemic CVD with ORs of  
159 1.24 (1.02, 1.52) and 1.32 (1.10, 1.59). We found no significant association with risk  
160 of haemorrhagic stroke. Women-to-men ratios of ORs revealed no differences  
161 between sexes.

162 **Figure 2** shows the MR analyses for gestational hypertension and CVD events. In  
163 women and men, respectively, ORs were 1.22 (1.10, 1.36) and 1.28 (1.16, 1.42) for  
164 CVD and 1.22 (1.10, 1.37) and 1.32 (1.19, 1.47) for ischaemic CVD. ORs for  
165 haemorrhagic stroke were 1.37 (1.07, 1.77) and 1.12 (0.72, 1.75) in women and  
166 men, respectively. Again, women-to-men ratios of ORs were not statistically  
167 significantly different from one.

168 In sex-combined analyses both genetically proxied HDPs were related to a higher  
169 risk of CVD, ischaemic CVD, myocardial infarction, stroke, and ischaemic stroke, but  
170 not with haemorrhagic stroke and intracerebral haemorrhage (**Figure S2** and **Figure**  
171 **S3**). Genetically proxied gestational hypertension but not pre-eclampsia/eclampsia  
172 was associated with higher risk of subarachnoid haemorrhage.

#### 173 **Sensitivity analyses**

174 In sensitivity analyses, applying simple and weighted median regression, results  
175 were broadly similar when investigating genetically proxied pre-eclampsia/eclampsia  
176 in women (**Figure S4**), men (**Figure S5**), and women and men combined (**Figure**



177 **S6**). When applying MR-Egger, the OR for intracerebral haemorrhage was 6.21  
178 (1.16, 33.31) in the sex-combined analysis with indication of directional pleiotropy (P-  
179 value intercept=0.027). ORs from MR-Egger regression for all other cardiovascular  
180 events were not statistically significant. **Table S3** shows the results of MR-PRESSO,  
181 which detected outlying variants in the analysis of women, men, and in the sex-  
182 combined analysis. The effect sizes remained similar but the association between  
183 genetically proxied pre-eclampsia/eclampsia and higher risk of myocardial infarction  
184 in women became statistically significant.

185 When analysing genetically proxied gestational hypertension, results remained  
186 robust when implementing simple or median weighted regression for the analysis in  
187 women (**Figure S7**), in men (**Figure S8**), and in sex-combined analyses (**Figure S9**).  
188 In women, MR-Egger regression yielded a statistically significant intercept (P-  
189 value=0.002) when analysing the combined stroke endpoint (**Figure S7**). **Table S3**  
190 shows the results of MR-PRESSO, in which genetically proxied gestational  
191 hypertension was statistically significantly related to a higher risk of haemorrhagic  
192 stroke in the sex-combined analysis (OR 1.32 [1.22, 1.44]).

193 The Cox regression analysis included 258,416 women and 209,387 men without a  
194 history of CVD at baseline. As depicted in **Figure S10**, results remained broadly  
195 similar compared to the primary analysis. Genetically proxied pre-  
196 eclampsia/eclampsia was related to hazard ratios of 1.13 (0.95, 1.34) and 1.20 (1.01,  
197 1.44) for CVD in women and men, respectively, with no significant differences  
198 between the sexes. Hazard ratios for CVD were 1.17 (1.03, 1.32) in women and 1.25  
199 (1.13, 1.38) in men, when analysing genetically proxied gestational hypertension  
200 (**Figure S11**). Results of the sex-combined analysis are provided in **Figure S12** and  
201 **Figure S13** and were also comparable to the findings of the primary analysis.

202 **Figure S14** and **Figure S15** show the MR analyses by history of pregnancy. The  
203 excess risk for ischaemic stroke for genetic liability to gestational hypertension was  
204 higher in ever compared to never pregnant women with a ratio of ORs of 1.84 (1.04,  
205 3.24). We found no significant differences when analysing pre-eclampsia/eclampsia  
206 and gestational hypertension and other CVD events.



## 207 **MR analysis of genetically proxied HDPs with blood pressure-traits** 208 **and cardiovascular risk factors**

209 **Figure 3** shows the associations between genetically proxied pre-  
210 eclampsia/eclampsia and a range of cardiovascular risk factors. Genetically proxied  
211 pre-eclampsia/eclampsia was related to higher levels of SBP and DBP and younger  
212 age at hypertension diagnosis. Furthermore, we found a significant association with  
213 lower levels of total cholesterol in both women and men. There were no sex-  
214 differences in any of the associations.

215 Relations between genetically proxied gestational hypertension and cardiovascular  
216 risk factors are depicted in **Figure 4**. Genetically proxied gestational hypertension  
217 was associated with higher levels of SBP and DBP and younger age at hypertension  
218 diagnosis in women and men with no statistically significant differences between  
219 women and men.

220 Sex-combined analyses for genetically proxied pre-eclampsia/eclampsia and  
221 gestational hypertension are shown in **Figure S16** and **Figure S17**, respectively.  
222 Again, both genetically proxied pre-eclampsia/eclampsia and gestational  
223 hypertension were related to higher levels of SBP and DBP and younger age at  
224 hypertension diagnosis. Additionally, genetically proxied pre-eclampsia/eclampsia  
225 was associated with lower levels of several lipid parameters.

## 226 **Discussion**

227 In this analysis, we found associations between genetic liability to pre-  
228 eclampsia/eclampsia and gestational hypertension and higher risk of CVD in both  
229 women and men. Furthermore, both HDPs were related to higher levels of SBP and  
230 DBP and younger age at hypertension diagnosis.

## 231 **Findings from previous studies**

232 A positive association between HDPs and risk of CVD has previously been reported  
233 by observational studies. A large-scale meta-analysis showed that moderate and  
234 severe pre-eclampsia are associated with a higher risk of maternal CVD, with ORs of  
235 2.24 (1.72, 2.93) and 2.74 (2.48, 3.04), respectively.<sup>24</sup> The same is the case for

236 gestational hypertension, for which an OR for maternal CVD of 1.67 (1.28, 2.19) has  
237 been reported.<sup>24</sup> Moreover, a phenome-wide association analysis showed strong  
238 associations between polygenic risk scores of HDPs with CVD risk factors (such as  
239 hypertension, diabetes mellitus, hyperlipidaemia, and obesity) and CVD events  
240 (including ischaemic heart disease and coronary atherosclerosis) in women and  
241 men.<sup>19</sup> In addition, a recent MR analysis, which only included women for genetic  
242 associations with HDPs, showed genetically proxied HDPs to be related to a higher  
243 risk of coronary artery disease or ischaemic stroke.<sup>11</sup> Furthermore, genetically  
244 proxied pre-eclampsia and gestational hypertension were associated with a higher  
245 risk of coronary artery disease but not with risk of ischaemic stroke.<sup>11</sup> This is not in  
246 line with the results of the present study, in which we did find a significantly higher  
247 risk for ischaemic stroke for genetically proxied pre-eclampsia/eclampsia in women.  
248 However, it has to be noted that the previous MR study only included data from one  
249 database for obtaining genetic associations with genetically proxied HDPs and used  
250 sex-combined effect sizes for the genetic associations with CVD events, which could  
251 potentially explain these differences.<sup>11</sup> In the present MR study, we (1) used effect  
252 sizes for the genetic association with the exposure from a large-scale GWAS that  
253 meta-analysed results of multiple studies, (2) analysed sex-specific effect sizes for  
254 the genetic association with the outcome, (3) included analyses restricted to men,  
255 and (4) studied associations with blood pressure-, lipid-, liver-, and kidney-related  
256 traits.

## 257 **HDPs and blood pressure**

258 Per definition, hypertension is the major component of HDPs. In the present  
259 analysis, we showed that genetically proxied pre-eclampsia/eclampsia and  
260 gestational hypertension are significantly associated with both higher SBP and DBP  
261 later in life. Genetic correlation between HDPs and blood pressure has previously  
262 been demonstrated.<sup>19</sup> Notably, the genetic correlation between gestational  
263 hypertension and SBP was even higher than between SBP and DBP.<sup>19</sup> A previous  
264 MR analysis showed that higher genetically predicted SBP was also related to an  
265 elevated risk for pre-eclampsia/eclampsia.<sup>25</sup> Moreover, higher levels of genetically  
266 proxied blood pressure have been related to an increased risk of CVD in both  
267 women and men.<sup>26</sup> In case blood pressure lies on the causal pathway between pre-  
268 eclampsia/eclampsia and gestational hypertension and CVD, we speak of vertical

269 pleiotropy, which does not bias the findings of our MR analysis. However, we cannot  
270 fully exclude horizontal pleiotropy, which would violate the assumptions of MR. When  
271 applying MR-Egger, we found no significant intercepts in the relation of pre-  
272 eclampsia/eclampsia and CVD, which indicates absence of directional pleiotropy.  
273 We did find a significant MR-Egger intercept in the association between genetically  
274 proxied gestational hypertension and risk of stroke and ischaemic stroke in women.  
275 However, it has previously been discussed that MR-Egger results can be influenced  
276 by outlying variants.<sup>27</sup> When we further studied the relation between genetically  
277 proxied gestational hypertension and risk of stroke and ischaemic stroke applying  
278 MR-PRESSO, the findings of our primary analysis remained robust.

### 279 **Differences between ischaemic and haemorrhagic events**

280 Our MR analysis revealed both pre-eclampsia/eclampsia and gestational  
281 hypertension to be related to ischaemic CVD. Contrarily, we found no statistically  
282 significant association between pre-eclampsia/eclampsia and risk of haemorrhagic  
283 stroke. These findings are not in line with results from previous observational  
284 studies. In a US database it has been shown that pre-eclampsia/eclampsia was  
285 associated with an OR for pregnancy-related intracerebral haemorrhage of 10.39  
286 (8.32, 12.98).<sup>28</sup> Moreover, a study from Taiwan reported a hazard ratio for  
287 haemorrhagic stroke of 3.50 (2.31, 5.29) related to pre-eclampsia.<sup>29</sup> Another analysis  
288 in Canadian women found pre-eclampsia to be related to a higher risk of  
289 haemorrhagic stroke.<sup>30</sup> Therefore, our findings suggest that the results of  
290 observational studies may be biased by potential confounding factors affecting the  
291 relation between pre-eclampsia/eclampsia and risk of haemorrhagic stroke.  
292 However, especially our sex-specific analysis may have limited statistical power to  
293 analyse haemorrhagic stroke events, which could have prevented us from finding  
294 statistically significant associations. Nevertheless, in sex-combined analyses, we  
295 also did not find significant association of genetically proxied pre-  
296 eclampsia/eclampsia and occurrence of haemorrhagic stroke. In contrast, we did find  
297 a statistically significant association between genetically proxied gestational  
298 hypertension and the risk of subarachnoid haemorrhage in our sex-combined  
299 analysis. This indicates potential differences between the roles of pre-  
300 eclampsia/eclampsia and gestational hypertension in the risk for haemorrhagic  
301 stroke.

## 302 **HDPs in men and nulligravidae**

303 Our MR analysis also included men and nulligravidae, who can have the genetic  
304 liability to HDPs although the underlying phenotype can never express.  
305 Nevertheless, we found genetic liability to pre-eclampsia/eclampsia and gestational  
306 hypertension to be related to a higher risk of CVD events in men. Robillard et al.  
307 previously suggested the importance paternity in the development of pre-eclampsia  
308 and reported a significantly higher risk for pre-eclampsia in new paternity multiparas  
309 compared to same paternity multiparas and primiparas.<sup>31</sup> To further investigate how  
310 the genetic liability to HDPs expresses in men, we studied their relationship with a  
311 range of cardiovascular risk factors. Interestingly, genetically proxied HDPs were  
312 also related to younger age at hypertension diagnosis in men. A recently conducted  
313 phenome-wide association study investigated the relation between polygenic risk  
314 scores for pre-eclampsia/eclampsia and gestational hypertension with >1,000  
315 phenotypes in men and also reported hypertension to be one of the key associated  
316 characteristics.<sup>19</sup> This is indicative that earlier hypertension is a main driver of the  
317 underlying mechanisms leading to a higher CVD risk in males. We also analysed the  
318 genetic liability to HDPs and CVD in nulligravidae. Relations were similar in never  
319 and ever pregnant women for all CVD events, but ischaemic stroke, as we found a  
320 statistically significantly higher excess risk for ischaemic stroke related to the genetic  
321 liability to gestational hypertension for ever compared to never pregnant women.  
322 However, it should be noted that statistical power for the analysis of nulligravid  
323 women was limited. Consequently, the role of genetic liability to HDPs in CVD risk in  
324 nulligravidae needs further investigation.

## 325 **Strengths and limitations**

326 Our study has several strengths. We used data from UK Biobank, which provided  
327 adequate statistical power to conduct the MR analyses. Furthermore, we built our  
328 genetic instruments on a comprehensive large-scale GWAS that meta-analysed data  
329 from multiple studies.<sup>19</sup> Moreover, due to the use of individual-participant data from  
330 the UK Biobank, we were able to study sex-specific associations of genetic variants  
331 with CVD events. In addition, we conducted several sensitivity analyses including  
332 different methods of MR and a Cox-regression analysis based on time-to-event data.  
333 Our analysis also has limitations. First, the effect sizes for the genetic association

334 with the exposure variable were based on individuals of different ancestries, while  
335 the UK Biobank majorly includes individuals of European ancestry. Furthermore, we  
336 did not have adequate statistical power for analysing nulligravid women, limiting the  
337 interpretation of our findings. Moreover, MR analysis relies on three assumptions.  
338 The first assumption is that the instrumental variable is associated with the exposure.  
339 Phenotypic data on pre-eclampsia/eclampsia and gestational hypertension were not  
340 available in our dataset. Consequently, we were not able to investigate whether the  
341 genetic instruments correlated with the phenotype in our study. However, we  
342 calculated F-statistics for each SNP individually and all of them were  $\geq 30$  indicating  
343 that we have sufficiently strong instruments. In addition, these SNPs were obtained  
344 from an independent GWAS, which replicated the majority of associations in  
345 additional cohorts, supporting our assumption of having robust associations with the  
346 exposures. The second assumption is that the genetic instrument is not associated  
347 to any confounding factor. We studied the association of genetically proxied pre-  
348 eclampsia/eclampsia and gestational hypertension with several cardiovascular risk  
349 factors. We found significant associations between genetically predicted HDPs and  
350 lower levels of lipid parameters. As lower levels of some lipid parameters (e.g., total  
351 cholesterol) are known to be related to a lower cardiovascular risk,<sup>32</sup> while others  
352 have been related to a higher cardiovascular risk (e.g., high-density lipoprotein  
353 cholesterol),<sup>33</sup> the specific role of lipid levels on the pathway between HDPs and risk  
354 of cardiovascular events needs to be further investigated. The third assumption is  
355 that the genetic instrument can influence the outcome only via the exposure. To  
356 study this assumption, we conducted MR-Egger regression and MR-PRESSO, which  
357 indicated potential directional pleiotropy for single CVD events as discussed in detail  
358 above.

## 359 **Conclusion**

360 Genetic liability to HDPs including pre-eclampsia/eclampsia and gestational  
361 hypertension is associated with higher CVD risk, implying biological mechanisms  
362 relating to these disorders are causally related to CVD risk in both women and men.

## 363 **Perspectives**

364 This MR study demonstrated that genetic liability to pre-eclampsia/eclampsia and  
365 gestational hypertension is related to a higher risk for CVD. Additionally, genetic  
366 liability to HDPs was related to higher blood pressure levels and younger age at  
367 hypertension diagnosis. The findings were similar in women and men. This implies  
368 that biological mechanisms related to HDPs are causally related to CVD risk.  
369 Furthermore, it suggests that both HDPs and CVD events may be expressions of the  
370 same disease pathway at different stages in life and that HDPs may be an indicator  
371 for individuals at higher CVD risk later in life. While pregnancy allows identification of  
372 women at increased risk for future CVD, men and nulligravidae with the same  
373 genetic liability to HDPs may not have the opportunity to present at an earlier stage  
374 in life.

## 375 **Acknowledgements**

376 This research has been conducted using the UK Biobank Resource (Application  
377 Number 29916). We are extremely grateful to all participants in the UK Biobank.

## 378 **Sources of Funding**

379 This work was funded by the Austrian Science Fund (T 1253). SAEP is supported by  
380 a VIDJ Fellowship from the Dutch Organisation for Health Research and  
381 Development (ZonMw) (09150172010050).

## 382 **Disclosures**

383 None.

384 **Data availability**

385 Summary-level data from the GWAS have been published previously.<sup>19</sup> Data from  
386 the UK Biobank can be requested via their website  
387 (<https://www.ukbiobank.ac.uk/enable-your-research/apply-for-access>).



## 388 **Novelty and Relevance**

### 389 **What is New?**

- 390       • This Mendelian Randomisation study investigated the relation between  
391       genetically predicted hypertensive disorders of pregnancy and the risk of  
392       developing cardiovascular disease and several cardiovascular risk factors.

### 393 **What is Relevant?**

- 394       • The study found genetic liability to pre-eclampsia/eclampsia and gestational  
395       hypertension to be linked to a higher risk of cardiovascular disease events in  
396       both women and men.
- 397       • Earlier hypertension appears to be a main driver behind the relation of  
398       hypertensive disorders of pregnancy and increased cardiovascular risk.

### 399 **Clinical/Pathophysiological implications?**

- 400       • Hypertensive disorders of pregnancy seem to be an indicator for individuals at  
401       higher cardiovascular disease risk later in life.

402

## 403 **References**

- 404 1. Ford ND, Cox S, Ko JY, Ouyang L, Romero L, Colarusso T, Ferre CD,  
405 Kroelinger CD, Hayes DK, Barfield WD. Hypertensive Disorders in Pregnancy  
406 and Mortality at Delivery Hospitalization - United States, 2017-2019. *MMWR*  
407 *Morb Mortal Wkly Rep.* 2022;71:585–591. doi: 10.15585/mmwr.mm7117a1.
- 408 2. Global burden of 369 diseases and injuries in 204 countries and territories,  
409 1990-2019: a systematic analysis for the Global Burden of Disease Study 2019.  
410 *Lancet.* 2020;396:1204–1222. doi: 10.1016/S0140-6736(20)30925-9.
- 411 3. Abalos E, Cuesta C, Grosso AL, Chou D, Say L. Global and regional estimates  
412 of preeclampsia and eclampsia: a systematic review. *Eur J Obstet Gynecol*  
413 *Reprod Biol.* 2013;170:1–7. doi: 10.1016/j.ejogrb.2013.05.005.
- 414 4. Chappell LC, Cluver CA, Kingdom J, Tong S. Pre-eclampsia. *Lancet.*  
415 2021;398:341–354. doi: 10.1016/S0140-6736(20)32335-7.
- 416 5. Brown MA, Magee LA, Kenny LC, Karumanchi SA, McCarthy FP, Saito S, Hall  
417 DR, Warren CE, Adoyi G, Ishaku S. Hypertensive Disorders of Pregnancy:  
418 ISSHP Classification, Diagnosis, and Management Recommendations for  
419 International Practice. *Hypertension.* 2018;72:24–43. doi:  
420 10.1161/HYPERTENSIONAHA.117.10803.
- 421 6. National High Blood Pressure Education Program Working Group on High Blood  
422 Pressure. Report of the National High Blood Pressure Education Program  
423 Working Group on High Blood Pressure in Pregnancy. *American Journal of*  
424 *Obstetrics and Gynecology.* 2000;183:s1-s22. doi: 10.1067/mob.2000.107928.
- 425 7. Umesawa M, Kobashi G. Epidemiology of hypertensive disorders in pregnancy:  
426 prevalence, risk factors, predictors and prognosis. *Hypertens Res.* 2017;40:213–  
427 220. doi: 10.1038/hr.2016.126.
- 428 8. Duckitt K, Harrington D. Risk factors for pre-eclampsia at antenatal booking:  
429 systematic review of controlled studies. *BMJ.* 2005;330:565. doi:  
430 10.1136/bmj.38380.674340.E0.
- 431 9. Garovic VD, Dechend R, Easterling T, Karumanchi SA, McMurtry Baird S,  
432 Magee LA, Rana S, Vermunt JV, August P. Hypertension in Pregnancy:  
433 Diagnosis, Blood Pressure Goals, and Pharmacotherapy: A Scientific Statement  
434 From the American Heart Association. *Hypertension.* 2022;79:e21-e41. doi:  
435 10.1161/HYP.000000000000208.

- 436 10. Crump C, Sundquist J, McLaughlin MA, Dolan SM, Govindarajulu U, Sieh W,  
437 Sundquist K. Adverse pregnancy outcomes and long term risk of ischemic heart  
438 disease in mothers: national cohort and co-sibling study. *BMJ*.  
439 2023;380:e072112. doi: 10.1136/bmj-2022-072112.
- 440 11. Rayes B, Ardissino M, Slob EAW, Patel KHK, Girling J, Ng FS. Association of  
441 Hypertensive Disorders of Pregnancy With Future Cardiovascular Disease.  
442 *JAMA Netw Open*. 2023;6:e230034. doi: 10.1001/jamanetworkopen.2023.0034.
- 443 12. Ying W, Catov JM, Ouyang P. Hypertensive Disorders of Pregnancy and Future  
444 Maternal Cardiovascular Risk. *J Am Heart Assoc*. 2018;7:e009382. doi:  
445 10.1161/JAHA.118.009382.
- 446 13. O'Kelly AC, Michos ED, Shufelt CL, Vermunt JV, Minissian MB, Quesada O,  
447 Smith GN, Rich-Edwards JW, Garovic VD, El Khoudary SR, et al. Pregnancy  
448 and Reproductive Risk Factors for Cardiovascular Disease in Women. *Circ Res*.  
449 2022;130:652–672. doi: 10.1161/CIRCRESAHA.121.319895.
- 450 14. Skrivankova VW, Richmond RC, Woolf BAR, Yarmolinsky J, Davies NM,  
451 Swanson SA, VanderWeele TJ, Higgins JPT, Timpson NJ, Dimou N, et al.  
452 Strengthening the Reporting of Observational Studies in Epidemiology Using  
453 Mendelian Randomization: The STROBE-MR Statement. *JAMA*.  
454 2021;326:1614–1621. doi: 10.1001/jama.2021.18236.
- 455 15. Allen N, Sudlow C, Downey P, Peakman T, Danesh J, Elliott P, Gallacher J,  
456 Green J, Matthews P, Pell J, et al. UK Biobank: Current status and what it  
457 means for epidemiology. *Health Policy and Technology*. 2012;1:123–126. doi:  
458 10.1016/j.hlpt.2012.07.003.
- 459 16. Sudlow C, Gallacher J, Allen N, Beral V, Burton P, Danesh J, Downey P, Elliott  
460 P, Green J, Landray M, et al. UK biobank: an open access resource for  
461 identifying the causes of a wide range of complex diseases of middle and old  
462 age. *PLoS Med*. 2015;12:e1001779. doi: 10.1371/journal.pmed.1001779.
- 463 17. Collins R. What makes UK Biobank special? *Lancet*. 2012;379:1173–1174. doi:  
464 10.1016/S0140-6736(12)60404-8.
- 465 18. Bycroft C, Freeman C, Petkova D, Band G, Elliott LT, Sharp K, Motyer A,  
466 Vukcevic D, Delaneau O, O'Connell J, et al. Genome-wide genetic data on  
467 ~500,000 UK Biobank participants. 2017. doi: 10.1101/166298.
- 468 19. Honigberg MC, Truong B, Khan RR, Xiao B, Bhatta L, Vy TH, Guerrero RF,  
469 Schuermans A, Selvaraj MS, Patel AP, et al. Genome-wide meta-analysis

- 470 identifies novel maternal risk variants and enables polygenic prediction of  
471 preeclampsia and gestational hypertension. 2022. doi:  
472 10.1101/2022.11.30.22282929.
- 473 20. Kamat MA, Blackshaw JA, Young R, Surendran P, Burgess S, Danesh J,  
474 Butterworth AS, Staley JR. PhenoScanner V2: an expanded tool for searching  
475 human genotype-phenotype associations. *Bioinformatics*. 2019;35:4851–4853.  
476 doi: 10.1093/bioinformatics/btz469.
- 477 21. Privé F, Luu K, Blum MGB, McGrath JJ, Vilhjálmsson BJ. Efficient toolkit  
478 implementing best practices for principal component analysis of population  
479 genetic data. *Bioinformatics*. 2020;36:4449–4457. doi:  
480 10.1093/bioinformatics/btaa520.
- 481 22. Yavorska OO, Burgess S. MendelianRandomization: an R package for  
482 performing Mendelian randomization analyses using summarized data. *Int J*  
483 *Epidemiol*. 2017;46:1734–1739. doi: 10.1093/ije/dyx034.
- 484 23. Verbanck M, Chen C-Y, Neale B, Do R. Detection of widespread horizontal  
485 pleiotropy in causal relationships inferred from Mendelian randomization  
486 between complex traits and diseases. *Nat Genet*. 2018;50:693–698. doi:  
487 10.1038/s41588-018-0099-7.
- 488 24. Grandi SM, Filion KB, Yoon S, Ayele HT, Doyle CM, Hutcheon JA, Smith GN,  
489 Gore GC, Ray JG, Nerenberg K, et al. Cardiovascular Disease-Related  
490 Morbidity and Mortality in Women With a History of Pregnancy Complications.  
491 *Circulation*. 2019;139:1069–1079. doi:  
492 10.1161/CIRCULATIONAHA.118.036748.
- 493 25. Ardissino M, Slob EAW, Millar O, Reddy RK, Lazzari L, Patel KHK, Ryan D,  
494 Johnson MR, Gill D, Ng FS. Maternal Hypertension Increases Risk of  
495 Preeclampsia and Low Fetal Birthweight: Genetic Evidence From a Mendelian  
496 Randomization Study. *Hypertension*. 2022;79:588–598. doi:  
497 10.1161/HYPERTENSIONAHA.121.18617.
- 498 26. Malik R, Georgakis MK, Vujkovic M, Damrauer SM, Elliott P, Karhunen V,  
499 Giontella A, Fava C, Hellwege JN, Shuey MM, et al. Relationship Between Blood  
500 Pressure and Incident Cardiovascular Disease: Linear and Nonlinear Mendelian  
501 Randomization Analyses. *Hypertension*. 2021;77:2004–2013. doi:  
502 10.1161/HYPERTENSIONAHA.120.16534.

- 503 27. Burgess S, Thompson SG. Interpreting findings from Mendelian randomization  
504 using the MR-Egger method. *Eur J Epidemiol.* 2017;32:377–389. doi:  
505 10.1007/s10654-017-0255-x.
- 506 28. Bateman BT, Schumacher HC, Bushnell CD, Pile-Spellman J, Simpson LL,  
507 Sacco RL, Berman MF. Intracerebral hemorrhage in pregnancy: frequency, risk  
508 factors, and outcome. *Neurology.* 2006;67:424–429. doi:  
509 10.1212/01.wnl.0000228277.84760.a2.
- 510 29. Hung S-K, Lee M-S, Lin H-Y, Chen L-C, Chuang C-J, Chew C-H, Yu B-H, Yang  
511 H-J, Hsu F-C, Chiou W-Y. Impact of Hypertensive Disorders of Pregnancy on  
512 the Risk of Stroke Stratified by Subtypes and Follow-Up Time. *Stroke.*  
513 2022;53:338–344. doi: 10.1161/STROKEAHA.121.034109.
- 514 30. Auger N, Fraser WD, Schnitzer M, Leduc L, Healy-Profítós J, Paradis G.  
515 Recurrent pre-eclampsia and subsequent cardiovascular risk. *Heart.*  
516 2017;103:235–243. doi: 10.1136/heartjnl-2016-309671.
- 517 31. Robillard P-Y, Dekker G, Scioscia M. The necessity to specify paternities in all  
518 obstetrical files in multigravidae. *J Reprod Immunol.* 2022;154:103747. doi:  
519 10.1016/j.jri.2022.103747.
- 520 32. Peters SAE, Singhatheh Y, Mackay D, Huxley RR, Woodward M. Total  
521 cholesterol as a risk factor for coronary heart disease and stroke in women  
522 compared with men: A systematic review and meta-analysis. *Atherosclerosis.*  
523 2016;248:123–131. doi: 10.1016/j.atherosclerosis.2016.03.016.
- 524 33. Di Angelantonio E, Sarwar N, Perry P, Kaptoge S, Ray KK, Thompson A, Wood  
525 AM, Lewington S, Sattar N, Packard CJ, et al. Major lipids, apolipoproteins, and  
526 risk of vascular disease. *JAMA.* 2009;302:1993–2000. doi:  
527 10.1001/jama.2009.1619.
- 528

## 529 **Figure Legends**

530 **Figure 1. Sex-specific Mendelian Randomisation analysis of genetically**  
531 **proxied pre-eclampsia/eclampsia and risk of cardiovascular events.** Results are  
532 from inverse variance weighted regression. Models were adjusted for age at baseline  
533 and the first 16 genetic principal components. Abbreviations: CI, confidence interval;  
534 CVD, cardiovascular disease; ICH, intracerebral haemorrhage; MI, myocardial  
535 infarction; OR, odds ratio; SAH, subarachnoid haemorrhage.

536 **Figure 2. Sex-specific Mendelian Randomisation analysis of genetically**  
537 **proxied gestational hypertension and risk of cardiovascular events.** Results are  
538 from inverse variance weighted regression. Models were adjusted for age at baseline  
539 and the first 16 genetic principal components. Abbreviations: CI, confidence interval;  
540 CVD, cardiovascular disease; ICH, intracerebral haemorrhage; MI, myocardial  
541 infarction; OR, odds ratio; SAH, subarachnoid haemorrhage.

542 **Figure 3. Sex-specific Mendelian Randomisation analysis of genetically**  
543 **proxied pre-eclampsia/eclampsia and cardiovascular risk factors.** Results are  
544 from inverse variance weighted regression. Results are from inverse variance  
545 weighted regression. Models were adjusted for age at baseline and the first 16  
546 genetic principal components. Abbreviations: ALAT, alanine aminotransferase;  
547 ASAT, aspartate aminotransferase; CI, confidence interval; GGT, gamma  
548 glutamyltransferase; HbA1c, glycated haemoglobin; HDL, high-density lipoprotein;  
549 LDL, low-density lipoprotein.

550 **Figure 4. Sex-specific Mendelian Randomisation analysis of genetically**  
551 **proxied gestational hypertension and cardiovascular risk factors.** Results are  
552 from inverse variance weighted regression. Models were adjusted for age at baseline  
553 and the first 16 genetic principal components. Abbreviations: ALAT, alanine  
554 aminotransferase; ASAT, aspartate aminotransferase; CI, confidence interval; GGT,  
555 gamma glutamyltransferase; HbA1c, glycated hemoglobin; HDL, high-density  
556 lipoprotein; LDL, low-density lipoprotein.

557

## 558 Tables

559 **Table 1. Participant characteristics.**

| Characteristic                       | Overall (n=487,203) |                                | Women (n=264,160) |                                | Men (n=223,043) |                                |
|--------------------------------------|---------------------|--------------------------------|-------------------|--------------------------------|-----------------|--------------------------------|
|                                      | N                   | Mean ± SD, median [IQR], N (%) | N                 | Mean ± SD, median [IQR], N (%) | N               | Mean ± SD, median [IQR], N (%) |
| Age, years                           | 487,203             | 56.5 ± 8.1                     | 264,160           | 56.4 ± 8.0                     | 223,043         | 56.7 ± 8.2                     |
| SBP, mmHg                            | 460,029             | 137.8 ± 18.7                   | 249,189           | 135.2 ± 19.2                   | 210,840         | 140.9 ± 17.5                   |
| DBP, mmHg                            | 460,034             | 82.2 ± 10.1                    | 249,192           | 80.7 ± 10.0                    | 210,842         | 84.1 ± 10.0                    |
| Hypertension                         | 474,896             | 224,331 (47.2%)                | 264,054           | 117,037 (44.3%)                | 210,842         | 107,294 (50.9%)                |
| Age at hypertension diagnosis, years | 117,548             | 50.6 ± 9.9                     | 54,552            | 50.0 ± 10.8                    | 62,996          | 51.2 ± 9.1                     |
| Body mass index, kg/m <sup>2</sup>   | 485,231             | 27.4 ± 4.8                     | 263,213           | 27.1 ± 5.2                     | 222,018         | 27.8 ± 4.2                     |
| Smoking status                       | 484,701             |                                | 262,851           |                                | 221,850         |                                |
| Never                                |                     | 265,322 (54.7%)                |                   | 156,643 (59.6%)                |                 | 108,679 (49.0%)                |
| Ex                                   |                     | 168,194 (34.7%)                |                   | 82,760 (31.5%)                 |                 | 85,434 (38.5%)                 |
| Current                              |                     | 51,185 (10.6%)                 |                   | 23,448 (8.9%)                  |                 | 27,737 (12.5%)                 |
| Total cholesterol, mmol/L            | 464,313             | 5.7 ± 1.1                      | 251,599           | 5.9 ± 1.1                      | 212,714         | 5.5 ± 1.1                      |
| HDL cholesterol, mmol/L              | 424,993             | 1.4 ± 0.4                      | 228,604           | 1.6 ± 0.4                      | 196,389         | 1.3 ± 0.3                      |
| Triglycerides, mmol/L                | 463,945             | 1.5 [1.0, 2.1]                 | 251,460           | 1.3 [1.0, 1.9]                 | 212,485         | 1.7 [1.2, 2.4]                 |
| LDL cholesterol, mmol/L              | 463,446             | 3.6 ± 0.9                      | 251,188           | 3.6 ± 0.9                      | 212,258         | 3.5 ± 0.9                      |
| Lipoprotein(a), nmol/L               | 371,400             | 21.1 [9.6, 61.9]               | 201,844           | 22.2 [9.9, 62.0]               | 169,556         | 19.8 [9.2, 61.8]               |
| Apolipoprotein A1, g/L               | 422,655             | 1.5 ± 0.3                      | 226,557           | 1.6 ± 0.3                      | 196,098         | 1.4 ± 0.2                      |
| Apolipoprotein B, g/L                | 461,972             | 1.0 ± 0.2                      | 250,732           | 1.0 ± 0.2                      | 211,240         | 1.0 ± 0.2                      |
| HbA1c, mmol/mol                      | 462,868             | 36.1 ± 6.8                     | 250,932           | 35.8 ± 6.0                     | 211,936         | 36.5 ± 7.6                     |
| Creatinine, μmol/L                   | 464,085             | 70.4 [61.4, 80.9]              | 251,489           | 63.1 [57.0, 70.0]              | 212,596         | 80.0 [72.5, 88.4]              |
| Albumin, g/L                         | 425,194             | 45.2 ± 2.6                     | 228,687           | 44.9 ± 2.6                     | 196,507         | 45.5 ± 2.6                     |
| ALAT, U/L                            | 464,133             | 20.1 [15.4, 27.4]              | 251,592           | 17.5 [13.9, 22.9]              | 212,541         | 23.9 [18.4, 32.0]              |
| ASAT, U/L                            | 462,594             | 24.4 [21.0, 28.8]              | 250,727           | 23.0 [20.0, 26.8]              | 211,867         | 26.2 [22.6, 31.0]              |
| Gamma-GT, U/L                        | 464,074             | 26.3 [18.5, 41.0]              | 251,496           | 21.4 [16.1, 31.9]              | 212,578         | 33.1 [23.7, 50.3]              |
| C-reactive protein, mg/L             | 463,305             | 1.3 [0.7, 2.8]                 | 251,162           | 1.4 [0.6, 3.0]                 | 212,143         | 1.3 [0.7, 2.5]                 |

560

561

562

563

Abbreviations: ALAT, alanine aminotransferase; ASAT, aspartate aminotransferase; DBP, diastolic blood pressure; ALAT, alanine aminotransferase; ASAT, aspartate aminotransferase;; HbA1c, glycated hemoglobin; HDL, high-density lipoprotein; IQR, interquartile range; LDL, low-density lipoprotein; SBP, systolic blood pressure; SD, standard deviation.



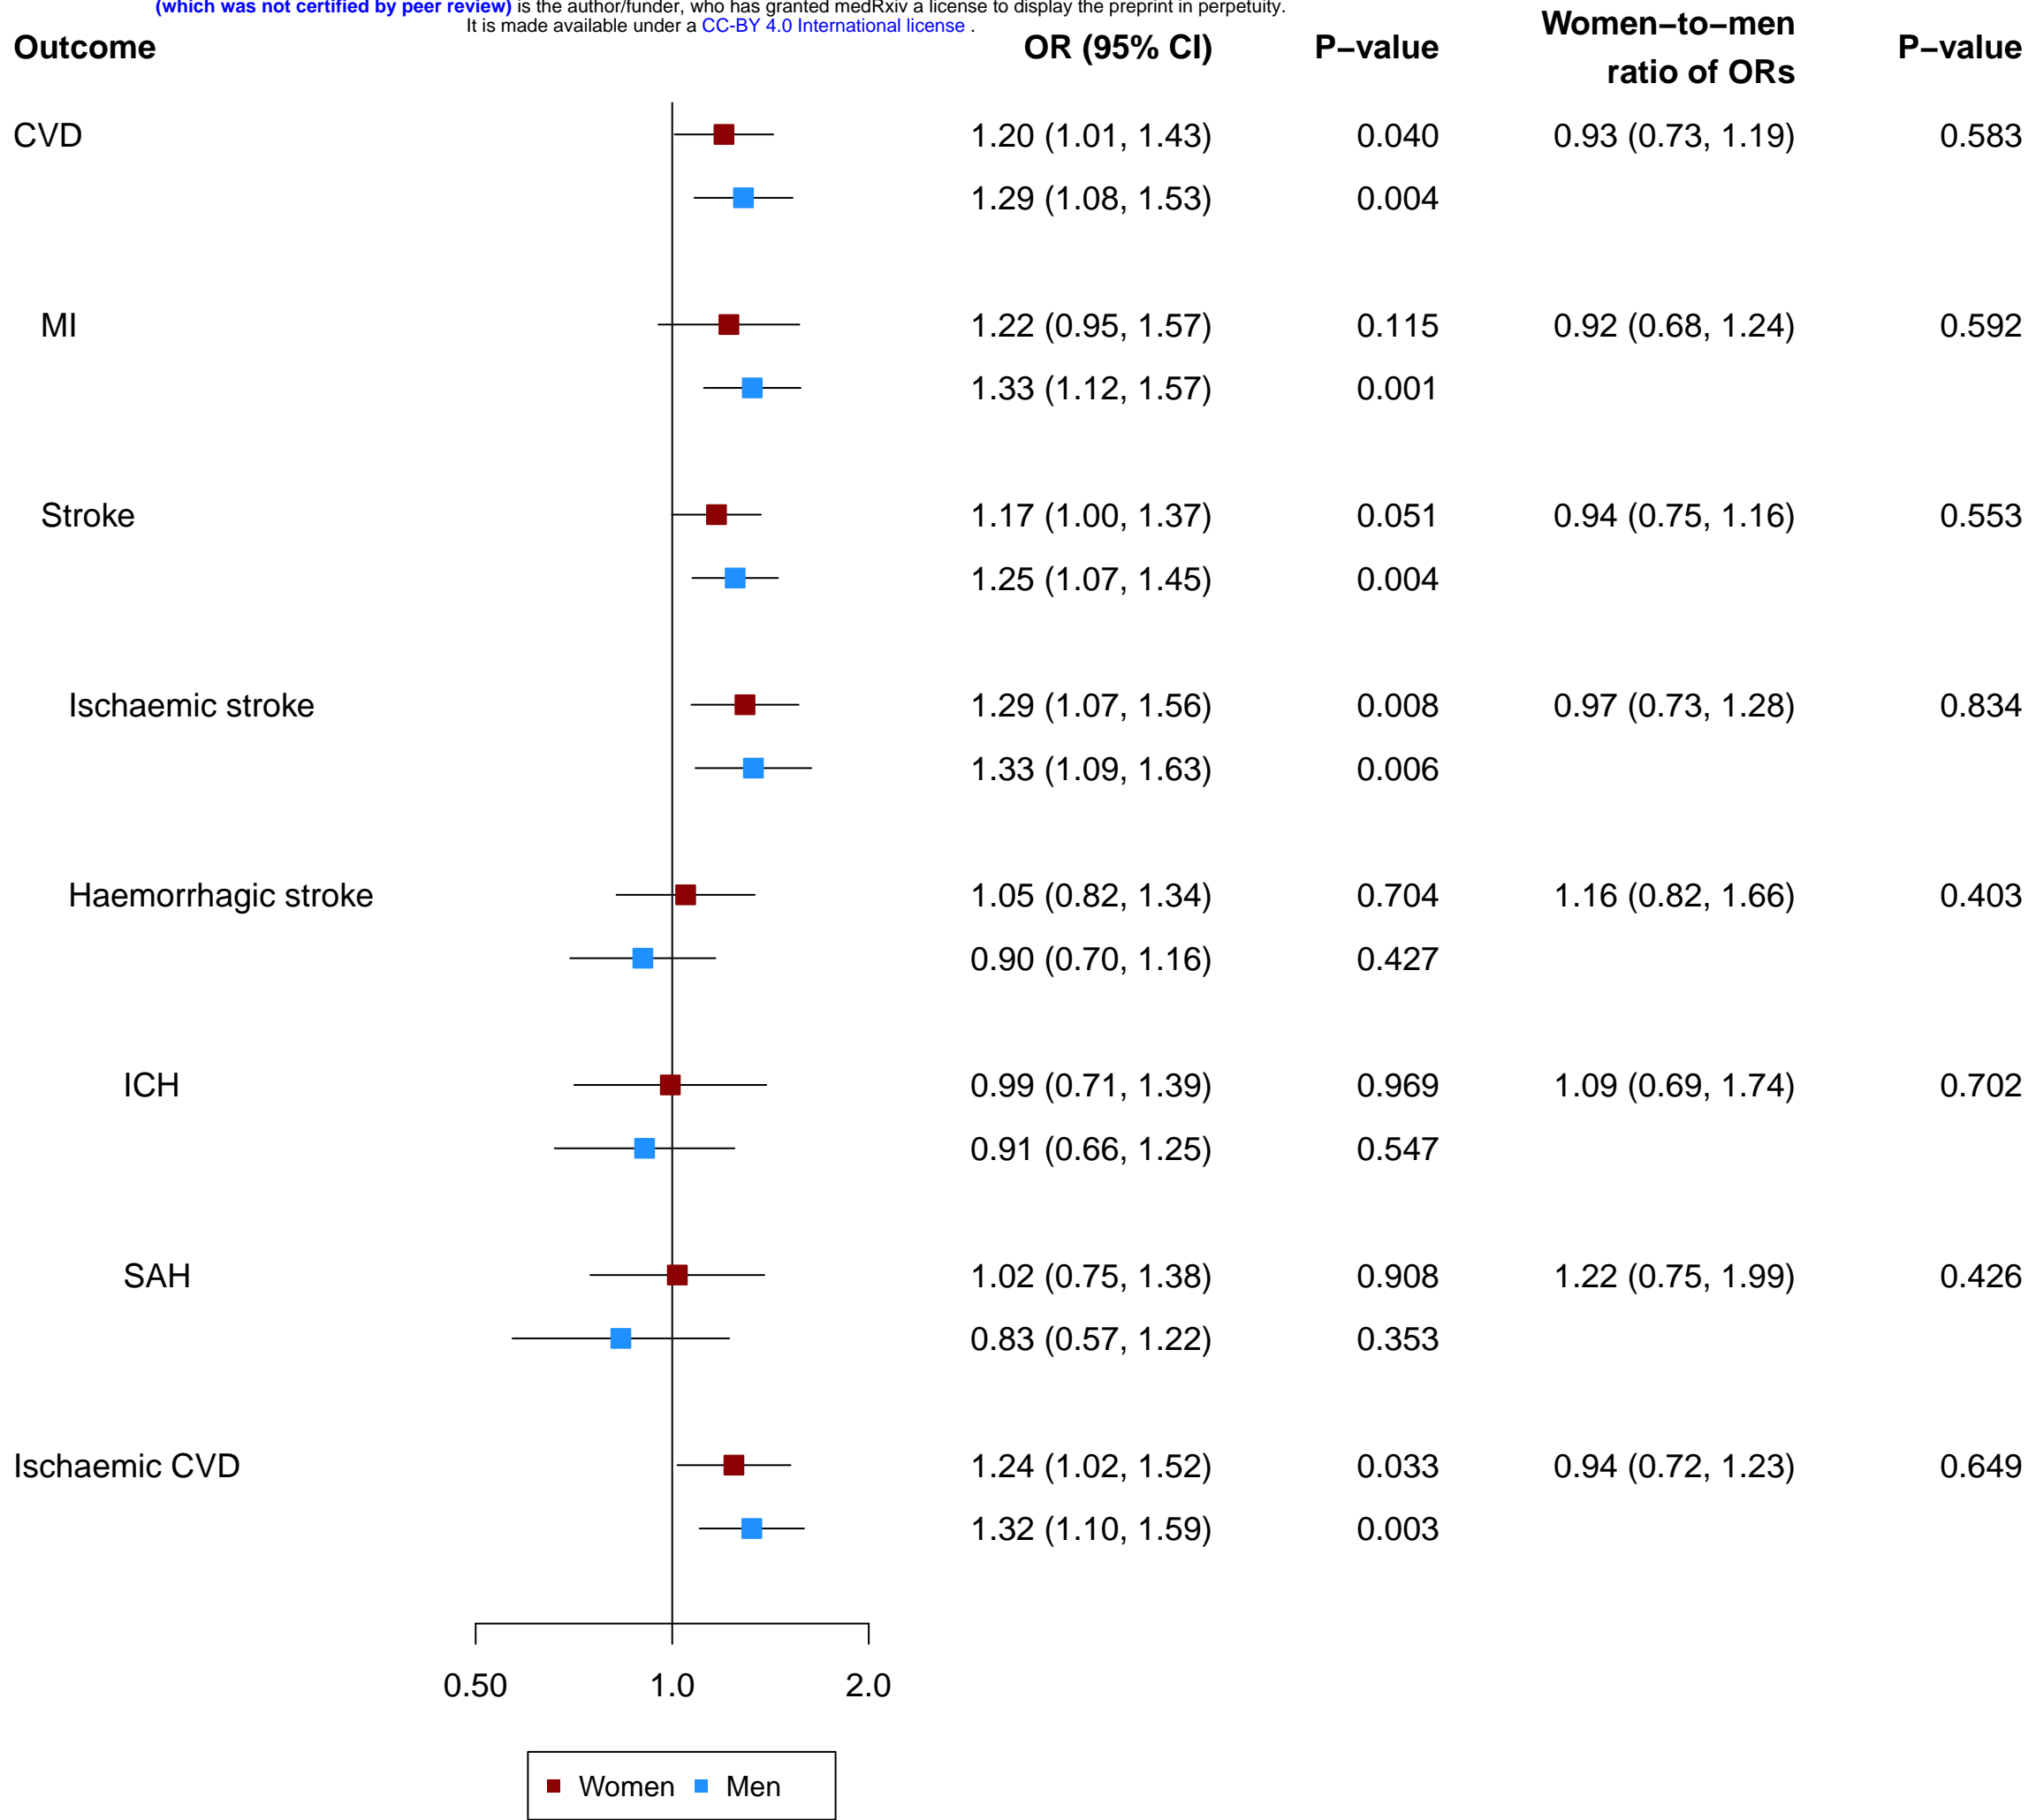

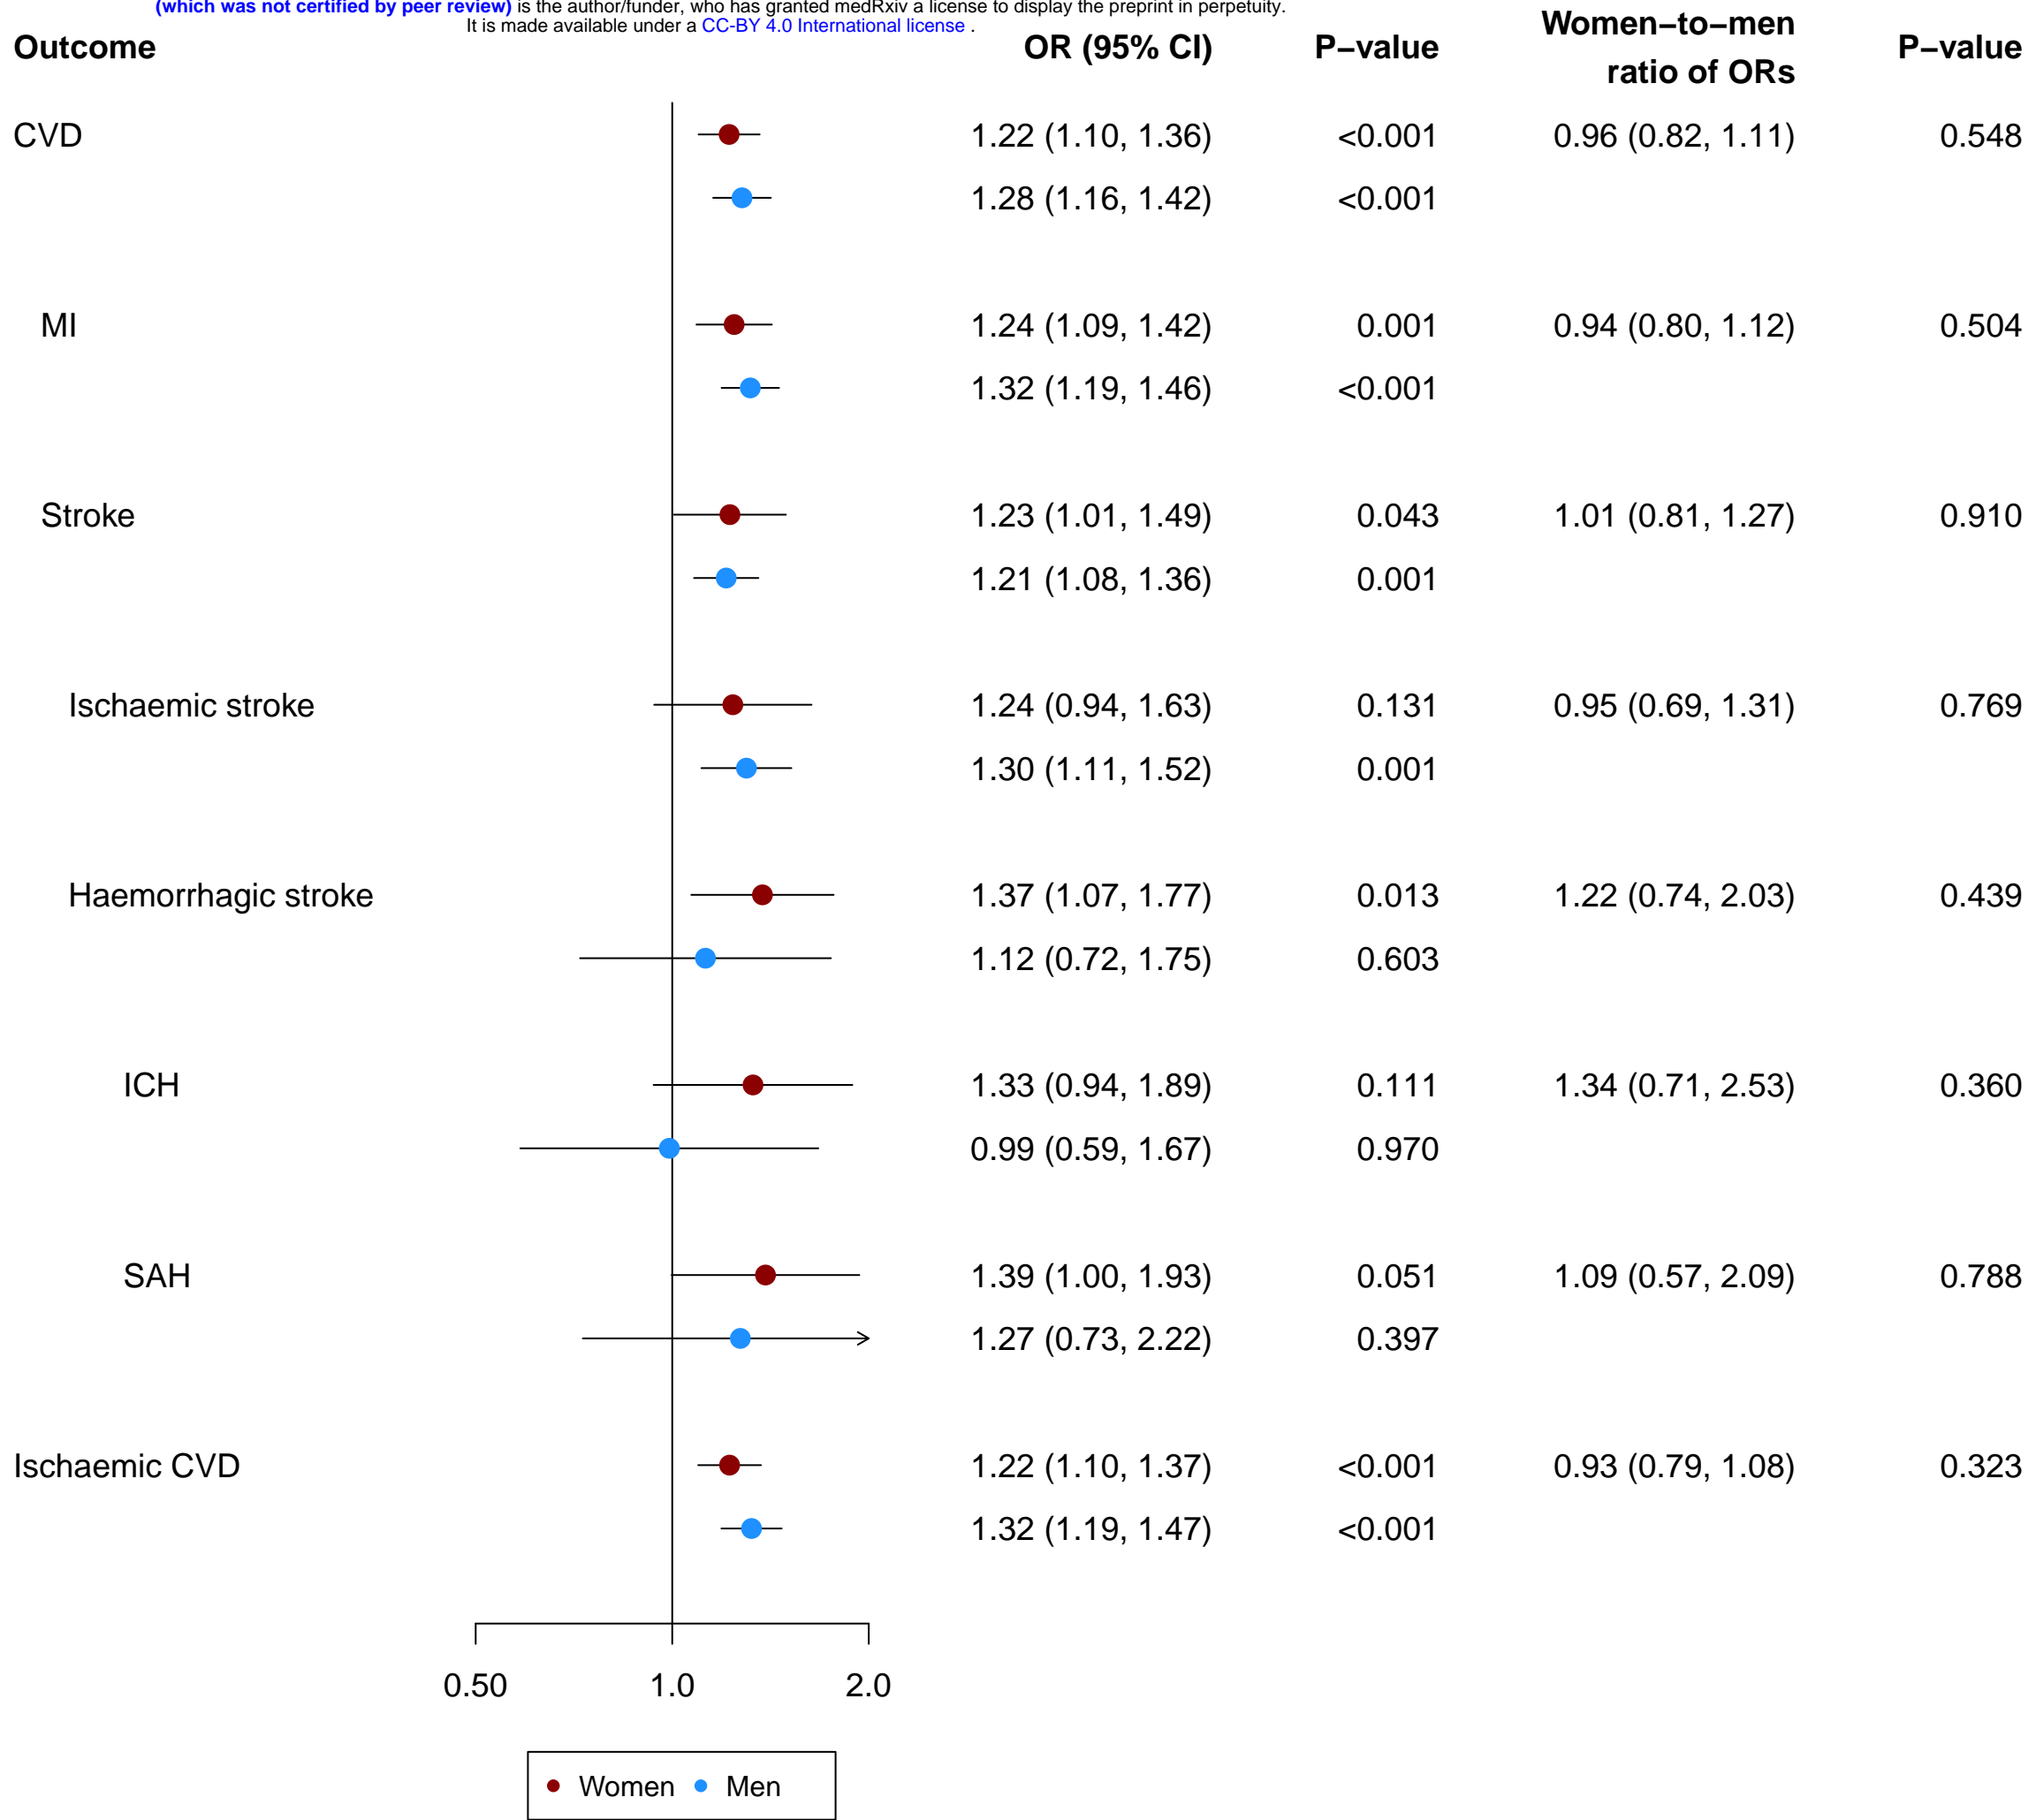

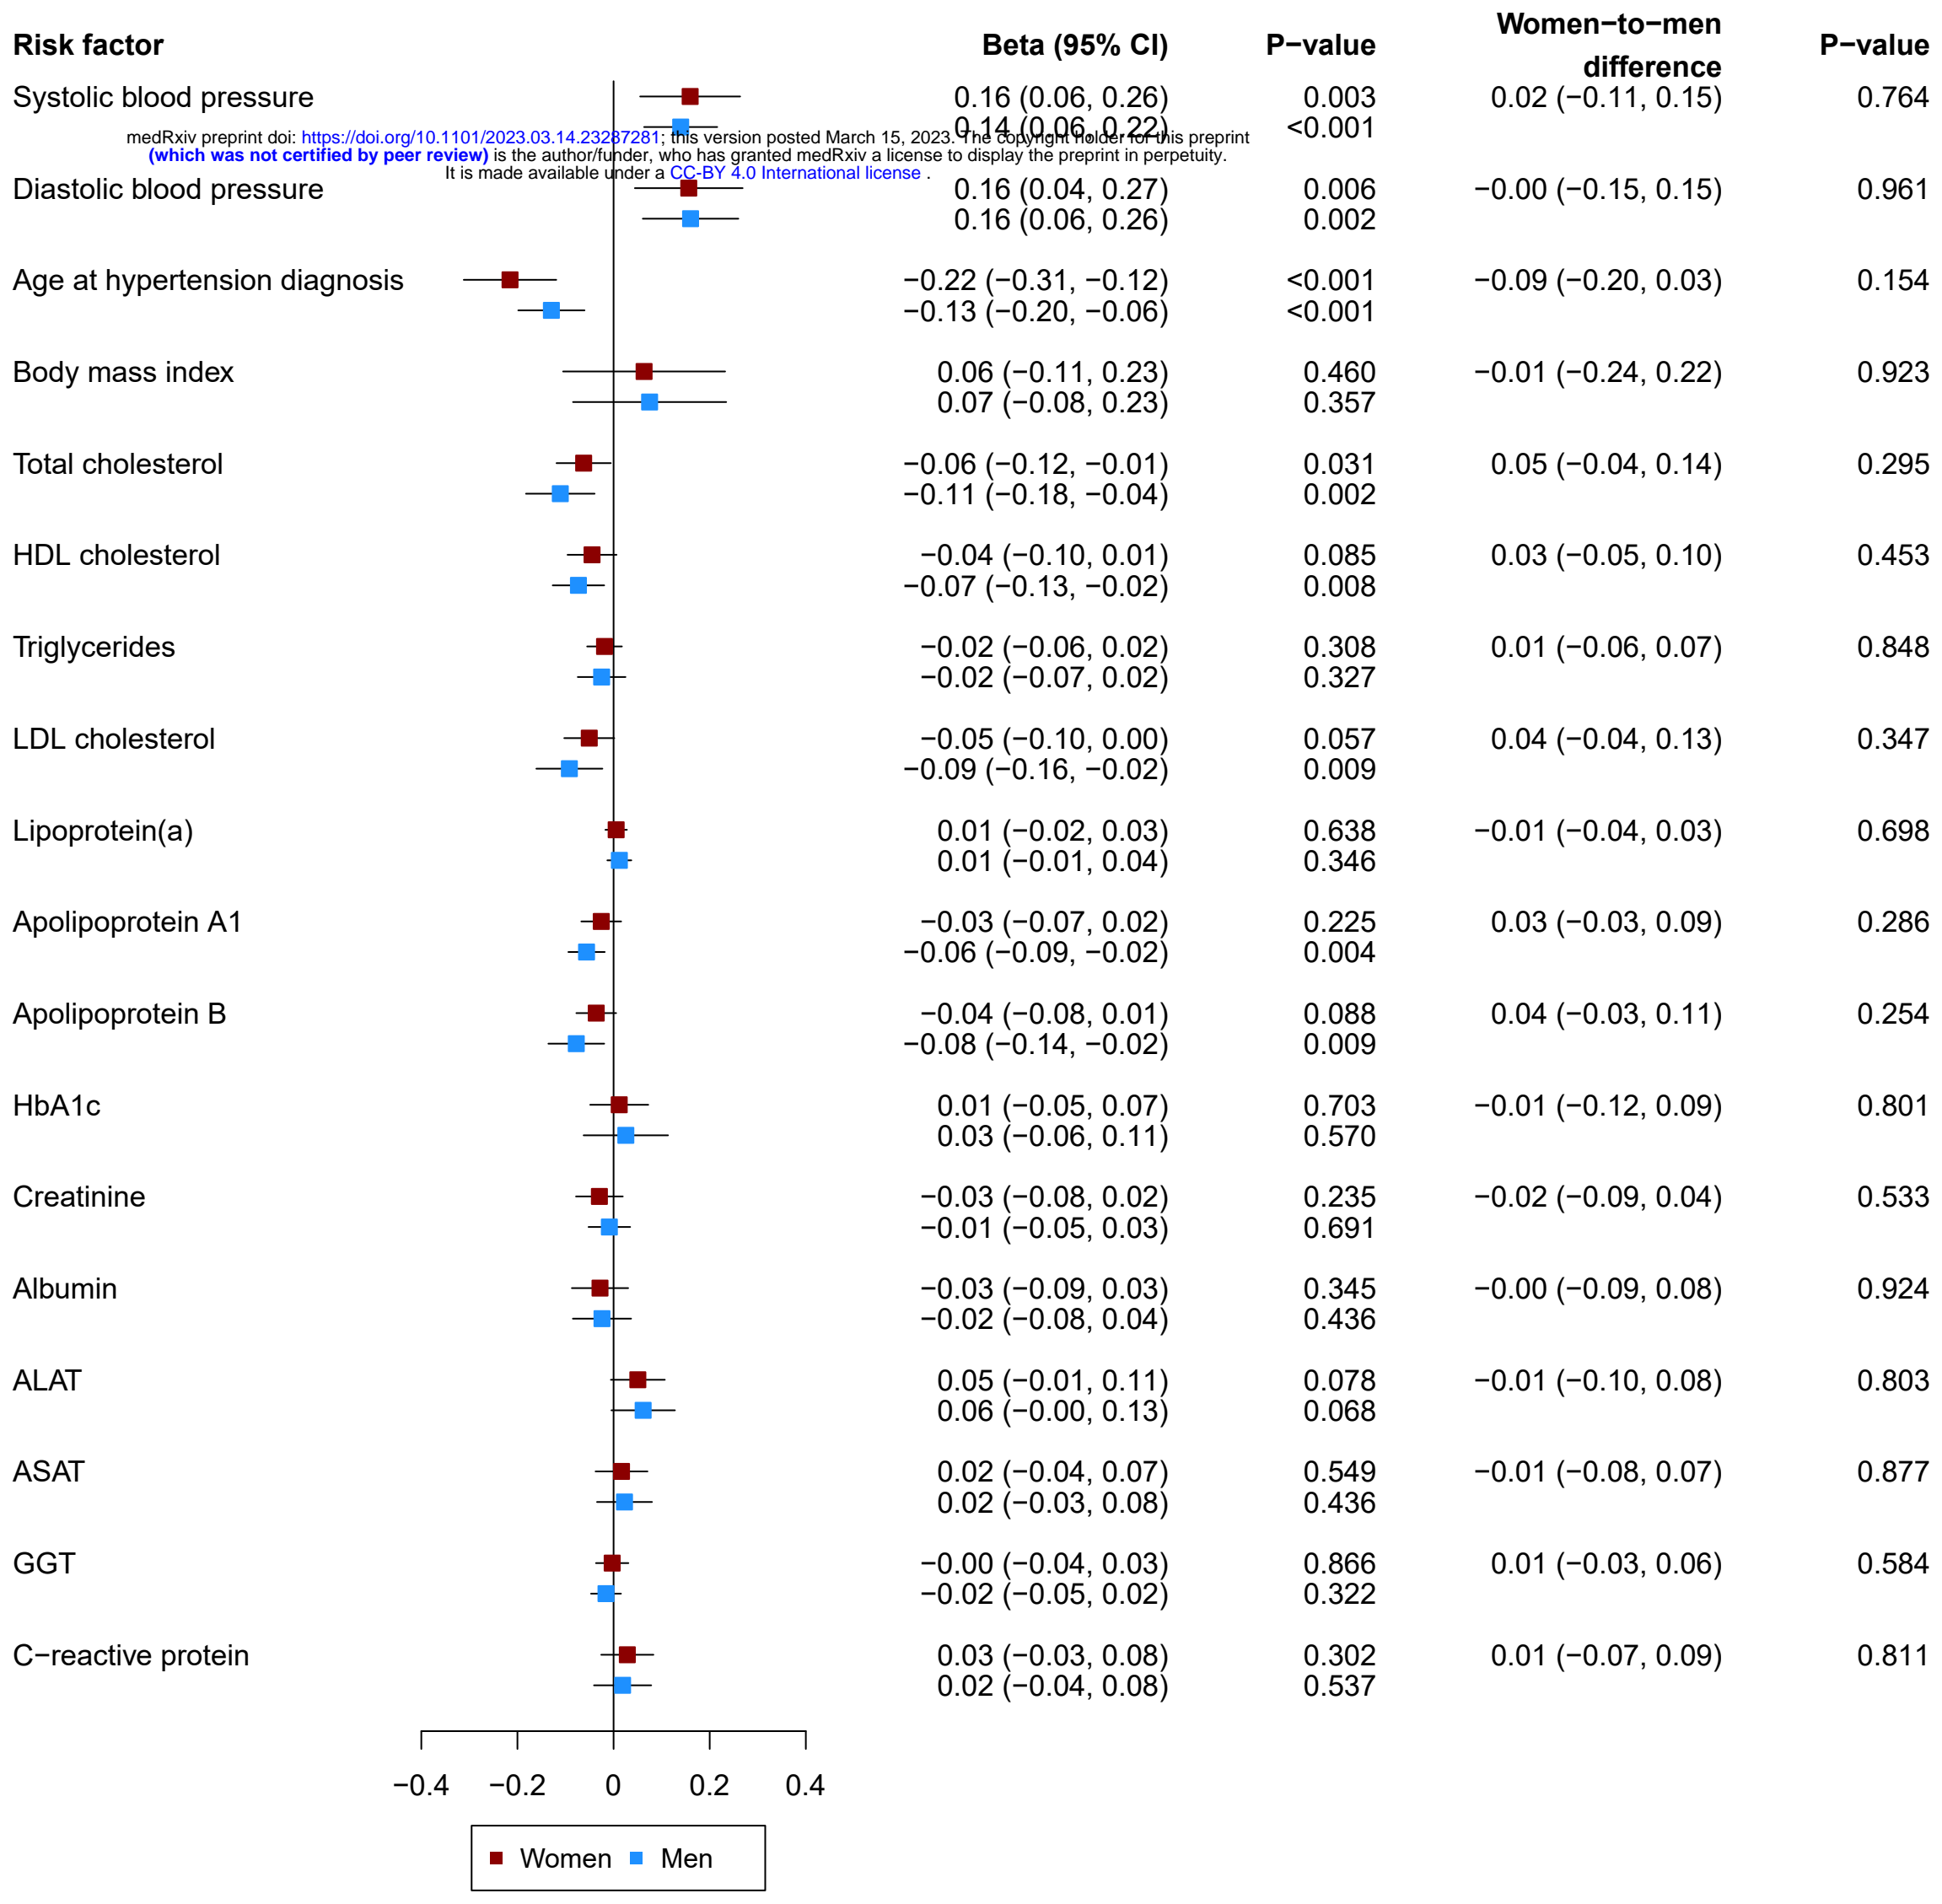

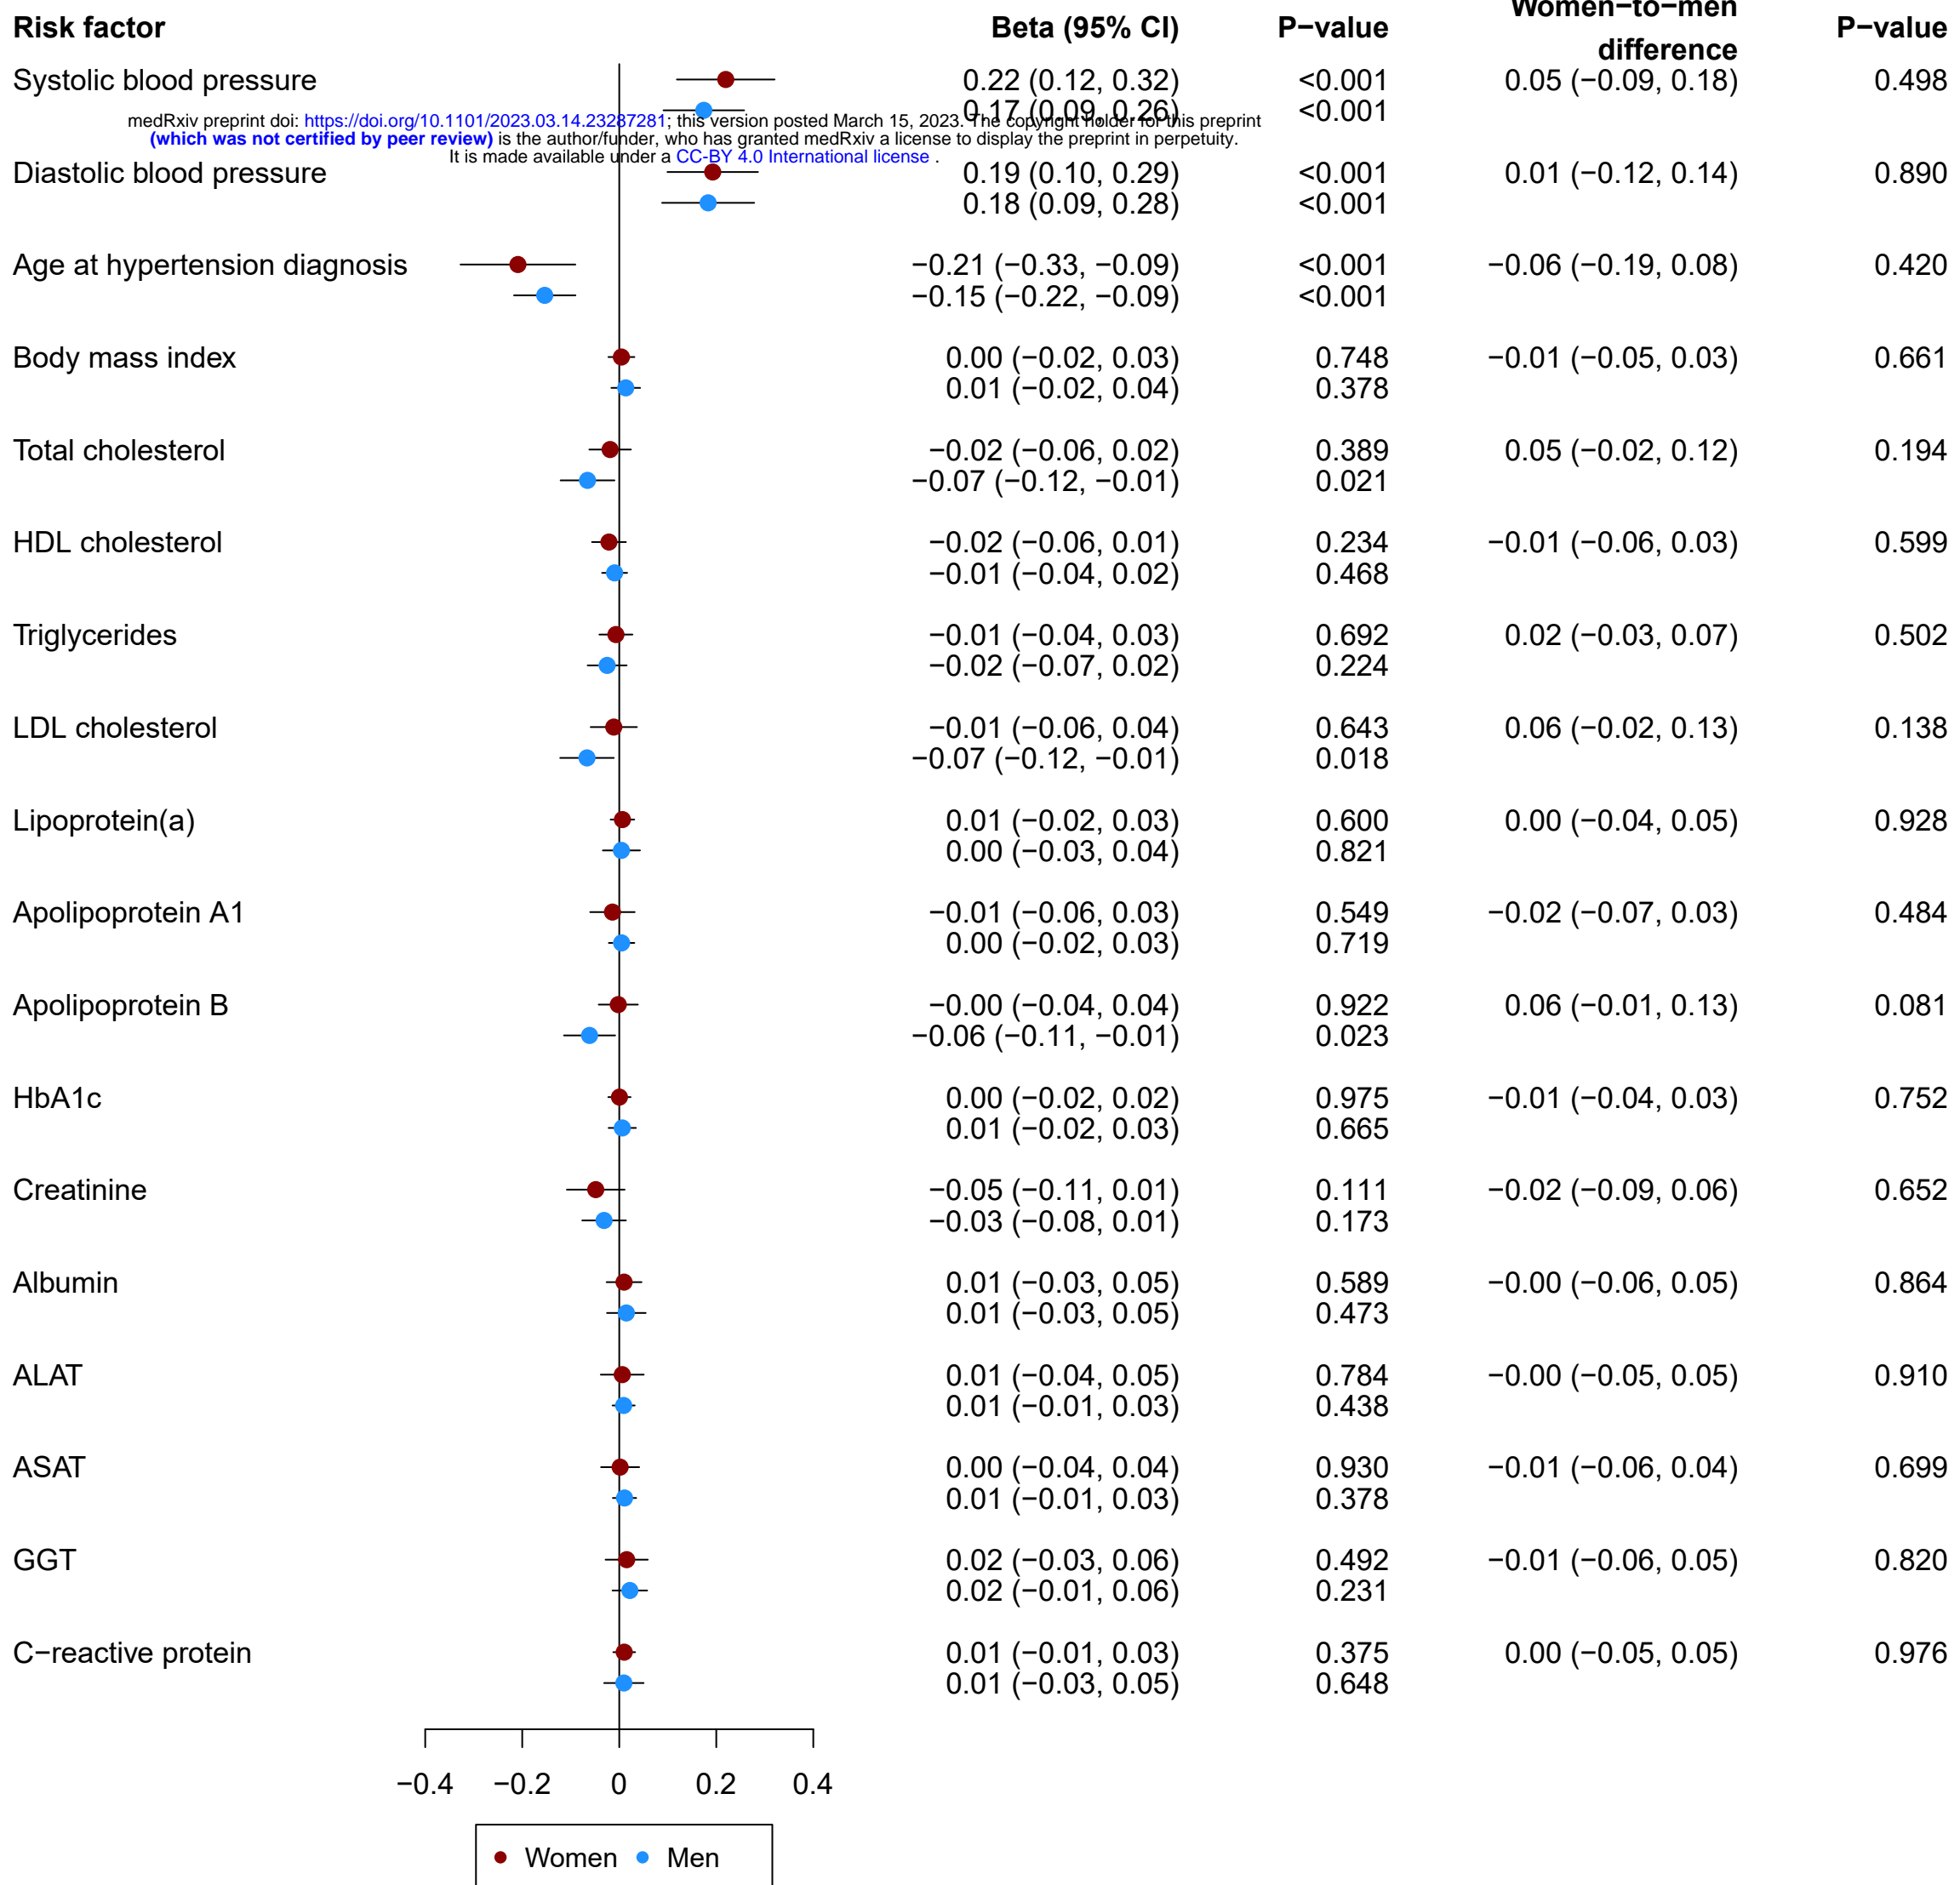

Source: https://medrxiv.org/content/10.1101/2023.03.14.23287281.full.pdf
